# Supplementary figures and images for: Blinded, Double‐Dummy, Parallel‐Group, Phase 2a Randomized Clinical Trial to Evaluate the Efficacy and Safety of a Highly Selective 5‐Hydroxytryptamine Type 4 Receptor Agonist in Critically Ill Patients With Enteral Feeding Intolerance
Source: PubMed Central journal article supplement — JPEN J Parenter Enteral Nutr. 2020 Jan 28;45(1):115–24. doi: 10.1002/jpen.1732 (PMC7891369; doi:10.1002/jpen.1732), 2020-01-28

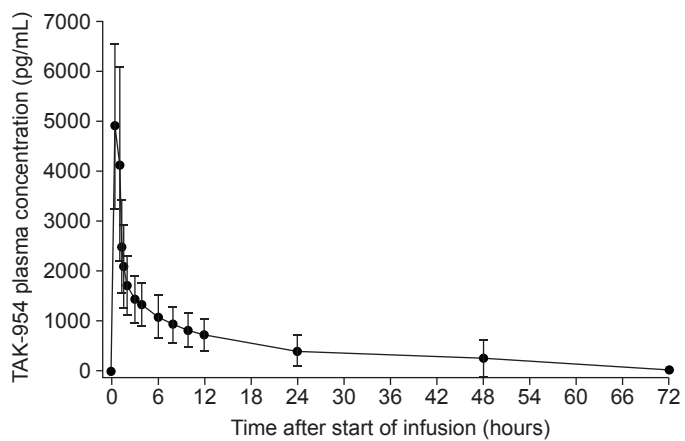

Supplement: JPEN-45-115-s001.pdf [file JPEN-45-115-s001.pdf]
